# Supplementary material for: Two Opposing Roles of SARS-CoV-2 RBD-Reactive Antibodies in Pre-Pandemic Plasma Samples From Elderly People in ACE2-Mediated Pseudovirus Infection
Source: PubMed Central journal article supplement (PMC8787138; doi:10.3389/fimmu.2021.813240), 2022-01-11
Supplement: Image_3.pdf [file Image_3.pdf]

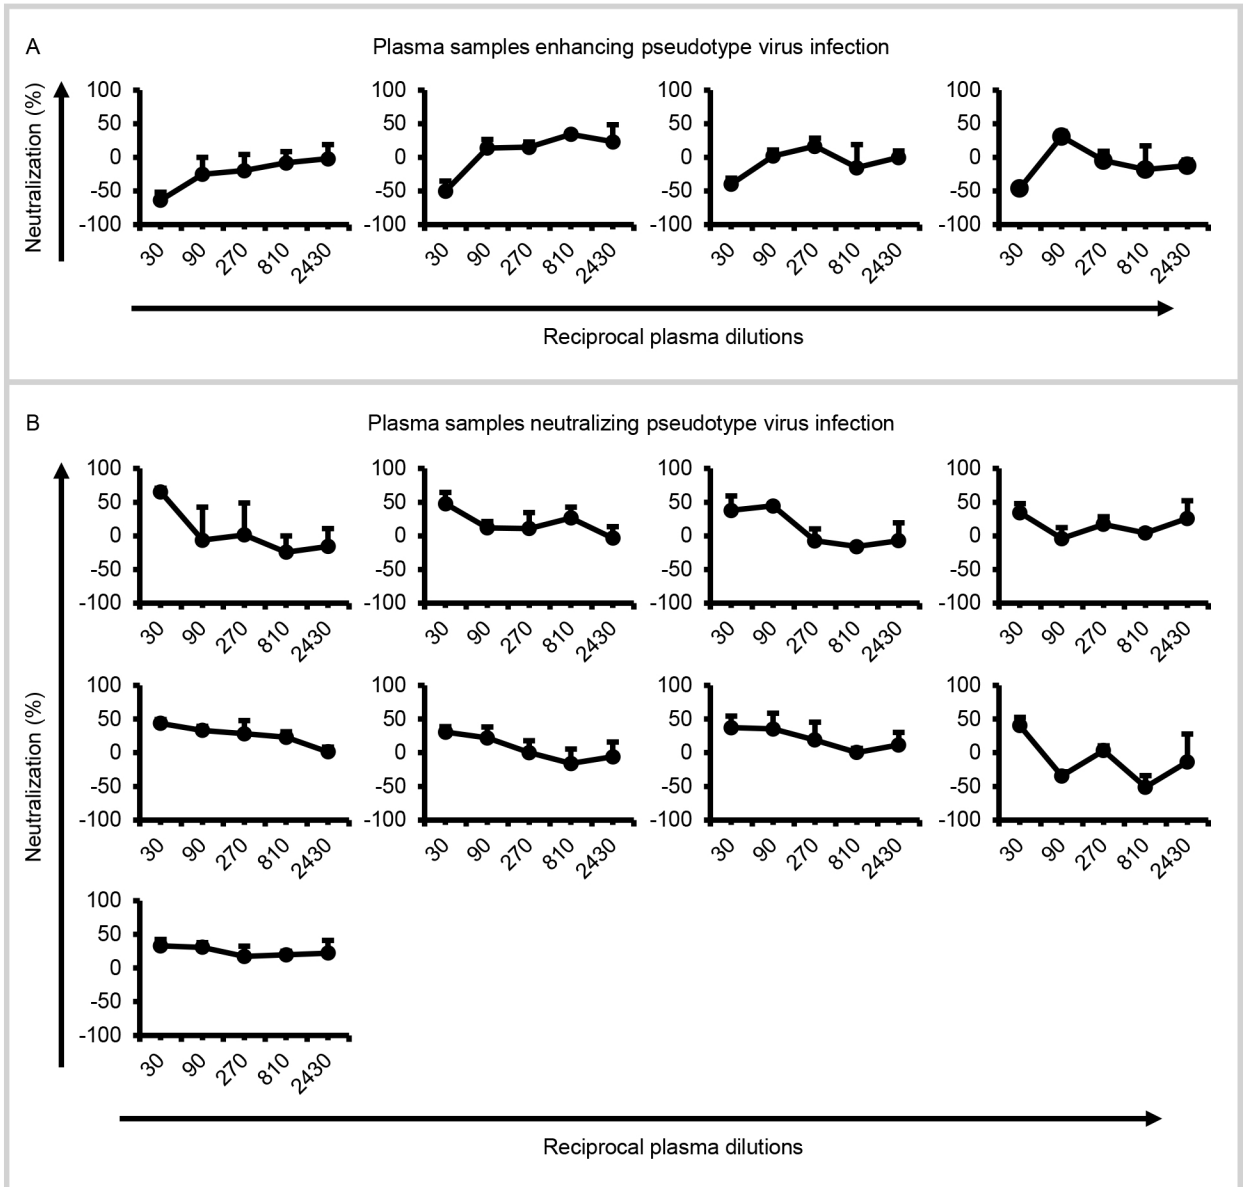

**Supplementary Figure 3.** SARS-CoV-2 pseudotype virus infection neutralization curves of plasma samples enhancing or neutralizing pseudotype virus infection. Raw neutralization curves for data from **Figure 4A** are shown, including for samples enhancing pseudotype virus infection (**A**,  $n = 4$ ) and samples neutralizing pseudotype virus infection (**B**,  $n = 9$ ). The mean and error bars are shown for each replicate.
